# Supplementary material
Source: PubMed Central journal article supplement (PMC3716305)
Supplement: supp_113.051912_Supplemental_Table_1.pdf [file supp_113.051912_Supplemental_Table_1.pdf]

**Regulation of Murine Hepatic Hydroxysteroid Sulfotransferase Expression in Hyposulfatemic Mice and in a Cell Model of 3'-Phosphoadenosine-5'-Phosphosulfate Deficiency.** Kathleen G. Barrett, Hailin Fang, Mary D. Gargano, Daniel Markovich, Thomas A. Kocarek, and Melissa Runge-Morris. Drug Metabolism and Disposition.

**Supplemental Table 1. PCR primers and oligonucleotides used in this study**

| Name                                                                             | Sequence                                                         | Comments                                                     |
|----------------------------------------------------------------------------------|------------------------------------------------------------------|--------------------------------------------------------------|
| <b>Primers to prepare Sult2a1 deletion series</b>                                |                                                                  |                                                              |
| <b>Reverse:</b>                                                                  | GGGAAGCTTCCTTGTAGGTTCTCTTAGGATTCCAG                              | Common to all deletions;<br><i>Hind</i> III site underscored |
| <b>Forward:</b>                                                                  |                                                                  |                                                              |
| -1202/+46                                                                        | GGGCTCGAGAATGCAGTTCTCACCCGTTGT                                   | <i>Xho</i> I site underscored                                |
| -628/+46                                                                         | GGGCTCGAGGAAGAAGGGCAGTTAATGTAATGACTATGAG                         |                                                              |
| -324/+46                                                                         | GGGCTCGAGGGAAAGGTTCTGTATGATCTCTGTC                               |                                                              |
| -233/+46                                                                         | GGGCTCGAGGCATTTCTATGTCCTATTACGTCTTCC                             |                                                              |
| -179/+46                                                                         | GGGCTCGAGTGGTCTCACAGGTTGTACAGAATGTT                              |                                                              |
| -128/+46                                                                         | GGGCTCGAGATAGAGTAACCTTTGACTGTAGGTG                               |                                                              |
| <b>Primers to prepare IR0 mutation</b>                                           |                                                                  |                                                              |
| <b>Forward:</b>                                                                  | CTGAGTCTCTGATTTGGGGTCAactAgTTGGTCTCACA<br>GGTTG                  | Mutated bases lower case                                     |
| <b>Reverse:</b>                                                                  | CAACCTGTGAGACCAAcTagtTGACCCCAAATCAGAGA<br>CTCAG                  |                                                              |
| <b>Primers to amplify region of SREBP1 5'-flanking region containing an LXRE</b> |                                                                  |                                                              |
| <b>Forward:</b>                                                                  | GCGACGCGTGGGTTGGGACGACAGTGACCGCCAG                               | <i>Mlu</i> I site underscored                                |
| <b>Reverse:</b>                                                                  | GCGAGATCTGGTGCTCTGAATGGGGCCGGGGTT                                | <i>Bgl</i> II site underscored                               |
| <b>Oligonucleotides to prepare reporter containing 3 copies of SPARC RORE</b>    |                                                                  |                                                              |
| <b>Forward:</b>                                                                  | TCGAGGCTGTTCTGGGTCATCCCGCTGTTCTGGGTC<br>ATCCCGCTGTTCTGGGTCATCCCA | ROREs underscored                                            |
| <b>Reverse:</b>                                                                  | GATCTGGGATGACCCAGAACAGCGGGATGACCCAG<br>AACAGCGGGATGACCCAGAACAGCC |                                                              |
